# Supplementary material for: Fabrication of a drug delivery system that enhances antifungal drug corneal penetration
Source: PubMed Central journal article supplement (PMC6058611; doi:10.1080/10717544.2018.1461278), 2018-04-16
Supplement: IDRD_A_1461278_SM0578.pdf [file IDRD_A_1461278_SM0578.pdf]

## **Supporting Information**

### **Fabrication of a drug delivery system that enhances antifungal drug corneal penetration**

Jingguo Li<sup>†\*</sup>, Zhanrong Li<sup>†</sup>, Zhen Liang, Lei Han, Huayang Feng, Siyu He, Junjie Zhang<sup>\*</sup>

Henan Key Laboratory of Ophthalmology and Visual Science, Henan Eye Hospital, People's Hospital of Zhengzhou University, Zhengzhou, P. R. China

### **Corresponding authors**

\*J.G.L. Fax: +86-371-65952907; e-mail: lijingguo@zzu.edu.cn.

\*J.J.Z. Fax: +86-371-65952907; e-mail: zhangjj66@126.com

<sup>†</sup> These authors contributed equally to this work.

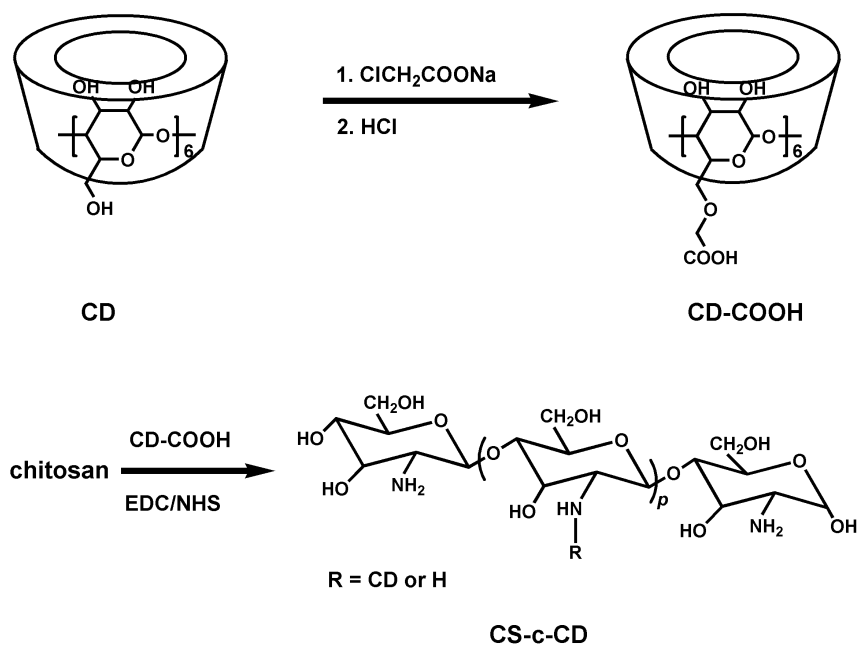

Figure S1. Synthetic route of the conjugated polymer.

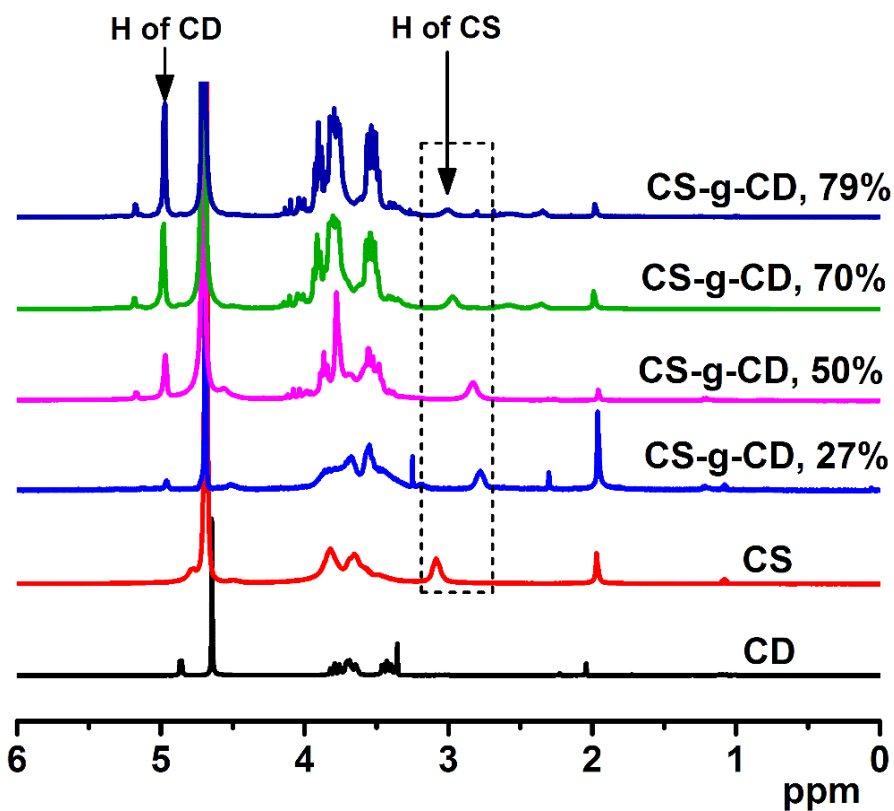

Figure S2.  $^1\text{H}$  NMR spectroscopy of the conjugated polymers. Spectra in  $\text{D}_2\text{O}$  were recorded on a Varian Unity 300 MHz spectrometer at  $25^\circ\text{C}$ .

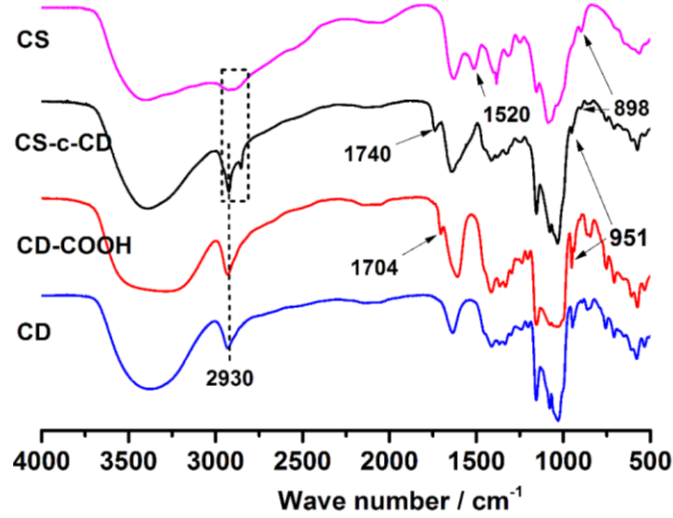

**Figure S3.** FTIR spectra of the conjugated polymer and its building units.

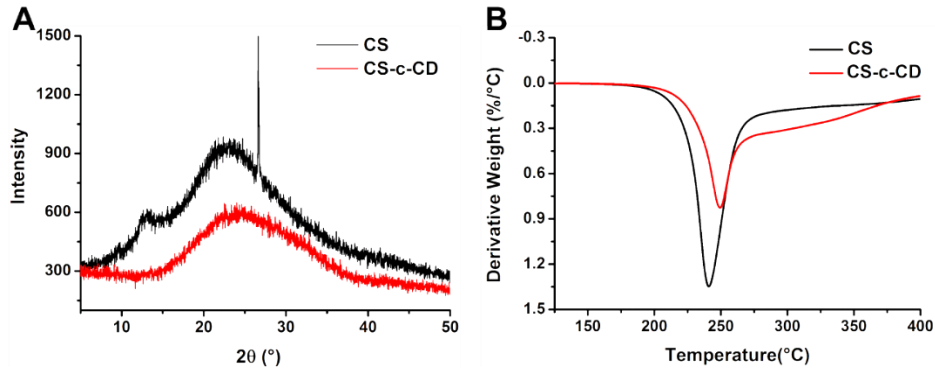

**Figure S4.** (A) X-ray diffraction patterns of CS and CS-c-CD. (B) Thermogravimetric analyses of CS and CS-c-CD.

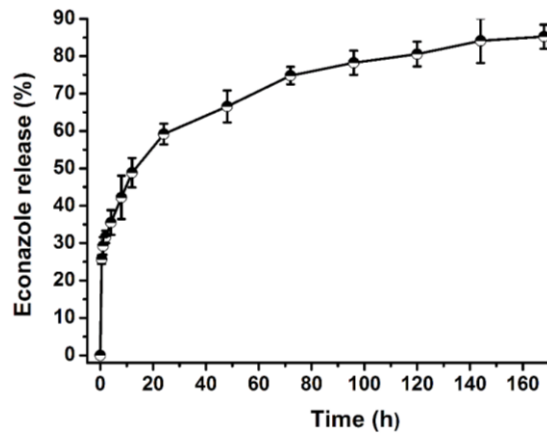

**Figure S5.** *In vitro* release profile of econazole-loaded system at pH 7.2.

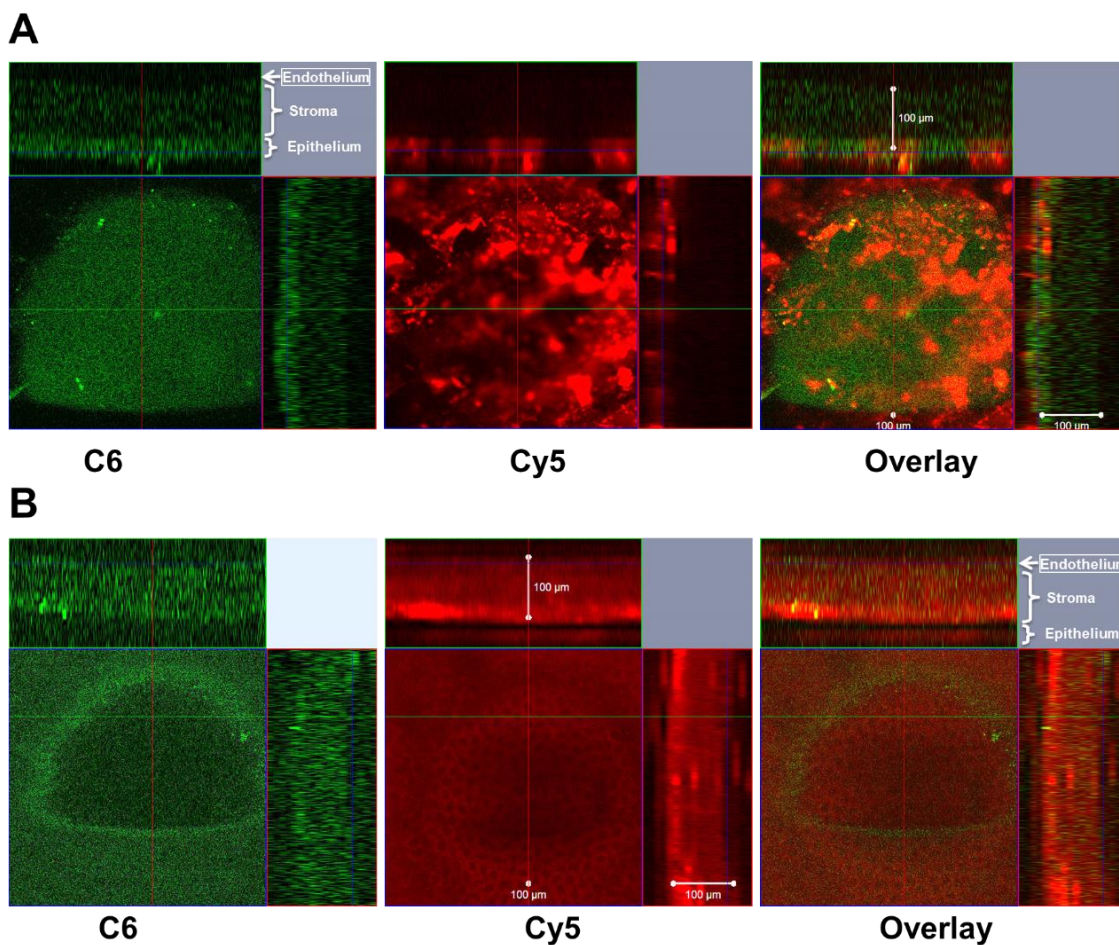

**Figure S6.** Representative *in vivo* two-photon microscopy images of corneal cross-sections at different times after the topical administration of a dual fluorescently labeled formulation of Cy5 and C6 in C57BL/6 mice. Each image shows xy (left lower quadrant), xz (right lower quadrant) and yz (right upper quadrant lower panel) slices through a 3D stack. (A) ICE 90 min after administration; (B) DCE 35 min after administration. According to our previous report,<sup>1</sup> the corneal center thickness in C57BL/6 mice was  $116.6 \pm 7.6 \mu\text{m}$ , including  $39.9 \pm 4.2 \mu\text{m}$  in the epithelial layer and  $76.7 \pm 6.0 \mu\text{m}$  in the stromal and endothelial layers.

**Table S1.** Results of the recovery and precision of econazole in rabbit cornea and aqueous humor.

| tissues       | Concentration        | Recovery                                   | Intraday <sup>c</sup>                       | Interday <sup>d</sup>          |
|---------------|----------------------|--------------------------------------------|---------------------------------------------|--------------------------------|
|               | ( $\mu\text{g/mL}$ ) | ( $\bar{x} \pm \text{SD}\%$ ) <sup>a</sup> | ( $\bar{x} \pm \text{RSD}\%$ ) <sup>b</sup> | ( $\bar{x} \pm \text{RSD}\%$ ) |
| Aqueous humor | 0.1                  | 91.8 $\pm$ 2.66                            | 0.092 $\pm$ 2.90                            | 0.127 $\pm$ 11.02              |
|               | 0.5                  | 103.5 $\pm$ 6.96                           | 0.518 $\pm$ 13.44                           | 0.452 $\pm$ 3.75               |
|               | 2.0                  | 108.5 $\pm$ 8.30                           | 2.169 $\pm$ 3.83                            | 2.06 $\pm$ 4.19                |
| Cornea        | 0.1                  | 103.8 $\pm$ 6.63                           | 0.109 $\pm$ 6.09                            | 0.104 $\pm$ 7.35               |
|               | 0.5                  | 99.7 $\pm$ 7.82                            | 0.499 $\pm$ 1.57                            | 0.503 $\pm$ 2.19               |
|               | 2.0                  | 99.3 $\pm$ 3.61                            | 1.987 $\pm$ 1.81                            | 2.128 $\pm$ 2.84               |

<sup>a</sup>  $\bar{x}$ : mean values; SD, standard deviation; <sup>b</sup> RSD, relative standard deviation; <sup>c</sup> five replicates at each concentration level; <sup>d</sup> three runs with five replicates at each concentration level over a period of 3 days.

**Table S2.** Mean concentrations of econazole (ECZ) in the aqueous humor and cornea after a single dose (50  $\mu\text{L}$ ) topical administration of 0.3% ECZ solution eye drops (E group) and 0.3% ECZ suspension eye drops (C group) in rabbit eyes with intact corneal epithelium.

| Time (min) | Aqueous humor (ng/mL) |         | Cornea ( $\mu\text{g/g}$ ) |                 |
|------------|-----------------------|---------|----------------------------|-----------------|
|            | E group               | C group | E group                    | C group         |
| 5          | 159.64 $\pm$ 51.55    | ND      | 62.31 $\pm$ 14.05**        | 1.06 $\pm$ 0.54 |
| 15         | 229.85 $\pm$ 72.25    | ND      | 39.10 $\pm$ 12.92**        | 0.89 $\pm$ 0.35 |
| 30         | 109.16 $\pm$ 33.38    | ND      | 19.73 $\pm$ 12.99**        | 1.62 $\pm$ 0.30 |
| 60         | 152.77 $\pm$ 41.61    | ND      | 5.26 $\pm$ 1.25**          | 0.40 $\pm$ 0.19 |
| 90         | 85.34 $\pm$ 19.97     | ND      | 1.56 $\pm$ 0.75            | ND              |
| 120        | 108.31 $\pm$ 18.19    | ND      | 2.63 $\pm$ 0.66            | ND              |
| 180        | 63.60 $\pm$ 24.63     | ND      | 0.50 $\pm$ 0.16            | ND              |
| 240        | 37.29 $\pm$ 14.49     | ND      | 0.38 $\pm$ 0.20            | ND              |
| 360        | 51.54 $\pm$ 28.03     | /       | 0.11 $\pm$ 0.04            | /               |

The values are presented as the means  $\pm$  SD (n = 6) (SD: standard deviation); concentrations for the E group compared with the C group, \*\* p < 0.01 (unpaired t-test); ND: not detected.

**Table S3.** Mean concentrations of econazole (ECZ) in the aqueous humor and cornea after a single dose (50  $\mu$ L) topical administration of 0.3% ECZ solution eye drops (E group) and 0.3% ECZ suspension eye drops (C group) in rabbit eyes with debrided corneal epithelium.

| Time (min) | Aqueous humor (ng/mL)  |                    | Cornea ( $\mu$ g/g) |                 |
|------------|------------------------|--------------------|---------------------|-----------------|
|            | E group                | C group            | E group             | C group         |
| 15         | 546.80 $\pm$ 238.60    | ND                 | 59.04 $\pm$ 20.21** | 4.75 $\pm$ 1.36 |
| 30         | 1495.52 $\pm$ 438.11** | 280.08 $\pm$ 96.41 | 37.24 $\pm$ 17.04** | 2.51 $\pm$ 1.79 |
| 60         | 582.50 $\pm$ 191.59**  | 148.35 $\pm$ 79.18 | 10.78 $\pm$ 1.75**  | 3.36 $\pm$ 1.65 |
| 120        | 1701.85 $\pm$ 356.47** | 269.39 $\pm$ 126.8 | 7.87 $\pm$ 6.33*    | 2.54 $\pm$ 1.03 |
| 240        | 200.71 $\pm$ 94.91     | ND                 | 0.23 $\pm$ 0.09     | ND              |

The values are presented as the means  $\pm$  SD (n = 6) (SD: standard deviation); concentrations for the E group compared with the C group, \* p < 0.05; \*\* p < 0.01 (unpaired t-test); ND, not detected.

**Table S4.** Main pharmacokinetic (PK) parameters of econazole (ECZ) after a single dose 50  $\mu$ L topical instillation of either eye drops into rabbit eyes with intact corneal epithelium (t = 360 min) or with debrided corneal epithelium (t = 240 min). E group, 0.3% ECZ solution eye drops; C group, 0.3% ECZ suspension eye drops. Each value represents the mean  $\pm$  SD (n = 6) (SD: standard deviation).

| PK parameters               |               |         | AUC <sub>0-t</sub> (min· $\mu$ g/mL) | T <sub>max</sub> (min) | C <sub>max</sub> <sup>a</sup> | t <sub>1/2</sub> (min) |
|-----------------------------|---------------|---------|--------------------------------------|------------------------|-------------------------------|------------------------|
| Intact corneal epithelium   | Aqueous humor | E group | 28.83                                | 15                     | 229.85 $\pm$ 72.25            | 78                     |
|                             |               | C group | /                                    | /                      | /                             | /                      |
|                             | Cornea        | E group | 1797.54                              | 5                      | 62.31 $\pm$ 14.05             | 69.48                  |
|                             |               | C group | 61.95                                | 30                     | 1.62 $\pm$ 0.30               | /                      |
| Debrided corneal epithelium | Aqueous humor | E group | 233.27                               | 120                    | 1701.9 $\pm$ 356.3            | 142.2                  |
|                             |               | C group | /                                    | 30                     | 280.08 $\pm$ 96.41            | /                      |
|                             | Cornea        | E group | 2929.86                              | 15                     | 59.04 $\pm$ 20.21             | 28.26                  |
|                             |               | C group | 511.8                                | 15                     | 4.75 $\pm$ 1.36               | 39                     |

<sup>a</sup> The units are ng/mL for aqueous humor and  $\mu$ g/g for cornea.

## REFERENCES

(1) Zhang, H. M.; Wang, L. Y.; Xie, Y. T.; Liu, S. S.; Deng, X. M.; He, S. Y.; Chen, G. M.; Liu, H.; Yang, B.; Zhang, J. J.; Sun, S. T.; Li, X. H.; Li, Z. J. The Measurement of Corneal Thickness from Center to Limbus in Vivo in C57BL/6 and BALB/c Mice Using Two-photon Imaging. *Exp. Eye Res.* **2013**, *115*, 255-262.
